# Supplementary material
Source: publisher site journal article supplement (https://www.spandidos-publications.com/7077/downloadSupplementary)
Supplement: Supplementary file 1 [file downloadSupplementary]

## Sheet: Sheet1
Table SI. List of 175 differentially expressed genes in colorectal cancer samples.
Gene	Regulation
RPS17	up
IRAK1	up
CCNB1	up
RPS5	up
SRPK1	up
PUM3	up
CDC25B	up
IMPDH2	up
KPNA2	up
HSPD1	up
NPM1	up
LDHB	up
PRDX4	up
POLD2	up
CCT4	up
SOX9	up
SET	up
SQLE	up
GPX2	up
RCN1	up
CKS2	up
NAP1L1	up
UCHL3	up
GGH	up
PCLAF	up
RPS10	up
MCM7	up
SSB	up
CTPS1	up
HSP90AB1	up
CCT3	up
HSPE1	up
C2	up
NCL	up
TMEM97	up
MCM2	up
KRT18	up
ODC1	up
TGIF1	up
NONO	up
EBNA1BP2	up
RPL8	up
NUP205	up
RPN2	up
IFITM1	up
NME1	up
COL1A2	up
CCT6A	up
COMT	up
S100P	up
SERPINB5	up
PSMA1	up
RPL12	up
SND1	up
SNRPF	up
EMG1	up
SLC1A5	up
AHCY	up
SLC12A2	up
CKS1B	up
RPS2	up
PCNA	up
CSE1L	up
CD46	up
RFC4	up
S100A11	up
CBFB	up
MRPL3	up
DNAJC2	up
SORD	up
RPS19	up
FBL	up
TDGF1	up
HSPH1	up
MEST	up
PAICS	up
NOLC1	up
MCM6	up
PABPC1	up
CCT5	up
EIF2S2	up
CKAP5	up
SNRPB	up
SPARC	up
CTSH	up
SSBP1	up
ATIC	up
TGFBI	up
CDKN3	up
TRAP1	up
SNRPD2	up
HSD17B2	down
HMGCS2	down
GZMM	down
HSD11B2	down
CES2	down
PYY	down
MAOA	down
UGT1A10	down
C8G	down
TSPAN7	down
GNA11	down
FCGBP	down
PTPRH	down
GNAO1	down
MT1G	down
AOC1	down
SECTM1	down
LGALS4	down
IGLL5	down
BMP2	down
SCNN1B	down
CRAT	down
MEP1A	down
ACAA2	down
MALL	down
PCSK2	down
GPT	down
GUCA2A	down
CD14	down
LGALS2	down
NR3C2	down
HMOX1	down
EBI3	down
MT1E	down
KIAA0513	down
CA4	down
PSD	down
MYLK	down
PLCD1	down
STAB1	down
HSD3B2	down
SLC6A8	down
GPER1	down
FUCA1	down
SLC26A2	down
LTK	down
MT2A	down
EYA2	down
UGT2B15	down
CKB	down
SLC26A3	down
PIGR	down
FLNC	down
CHGA	down
FBLN1	down
EDN3	down
ITPKA	down
PCK1	down
MT1X	down
ACADS	down
CA7	down
GUCA2B	down
MGLL	down
CLDN5	down
CTSG	down
FABP1	down
CD79A	down
IL1R2	down
CD19	down
SLC9A1	down
CA2	down
ANPEP	down
CEACAM7	down
FCER2	down
GCG	down
P2RX4	down
RAB27A	down
EDN2	down
MT1H	down
GPA33	down
SELENBP1	down
CYP3A4	down
JCHAIN	down
NDN	down
Up, upregulated; down, downregulated.
